# Supplementary material
Source: MDPI journal article supplement (https://www.mdpi.com/2227-9717/10/11/2357)
Supplement: s1 [file s1]

## Supporting Information

# Facile Synthesis of Nitrogen-Doped Carbon-Supported Rhodium–Cobalt Alloy Electrocatalyst for Oxygen Reduction Reaction

Sujung Park <sup>1,†</sup>, NaHyun Park <sup>1,†</sup>, Muthuchamy Nallal <sup>1,2</sup>, Mohammad Yusuf <sup>1</sup>, Sungkyun Park <sup>3</sup>, Jae-Myung Lee <sup>4,\*</sup> and Kang Hyun Park <sup>1,\*</sup>

<sup>1</sup> Department of Chemistry, Pusan National University, Busan 46241, Korea

<sup>2</sup> Department of Physics and Institute of High Pressure, Hanyang University, Seoul 04763, Korea

<sup>3</sup> Department of Physics, Pusan National University, Busan 46241, Korea

<sup>4</sup> Department of Naval Architecture and Ocean Engineering, Pusan National University, Busan 46241, Korea

\* Correspondence: [jaemlee@pusan.ac.kr](mailto:jaemlee@pusan.ac.kr) (J.-M.L.), [chemistry@pusan.ac.kr](mailto:chemistry@pusan.ac.kr) (K.H.P.); Tel.: +82-51-510-2238 (K.H.P.)

† These authors contributed equally to this work.

## **SI-1. Characterizations**

The transmission electron microscopy (TEM) images and high-angle annular dark-field scanning transmission electron microscopy (HAADF-STEM) images were collected on the Talos F200X operated at 200 kV with energy-disperse X-ray spectroscopy (EDS) mapping process system. To research the crystal structure of the composites, X-ray powder diffraction (XRD) patterns were recorded on a Rigaku D/MAX-2500 diffractometer. X-ray photoelectron spectroscopy (XPS) performance was measured using a K-alpha (TM) with a micro-focused monochromator X-ray source. Raman spectrum was collected using a Raman microscope with a 514 nm laser.

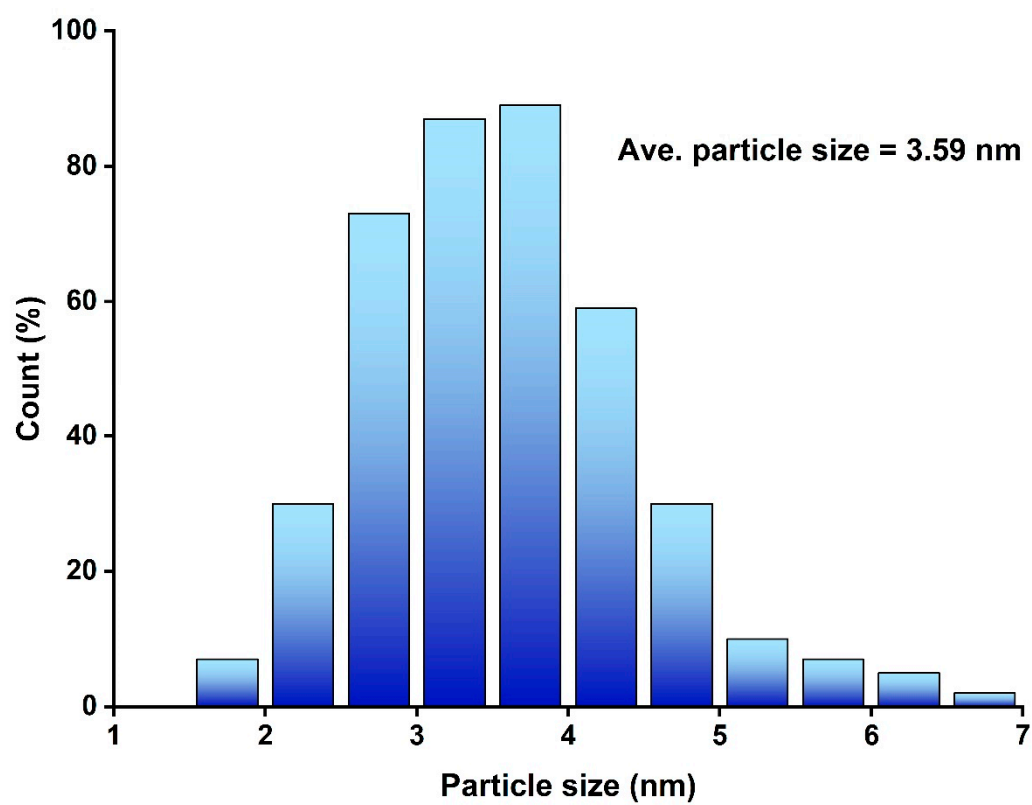

**Figure S1.** Histogram of particles size distribution of RhCo/NC.

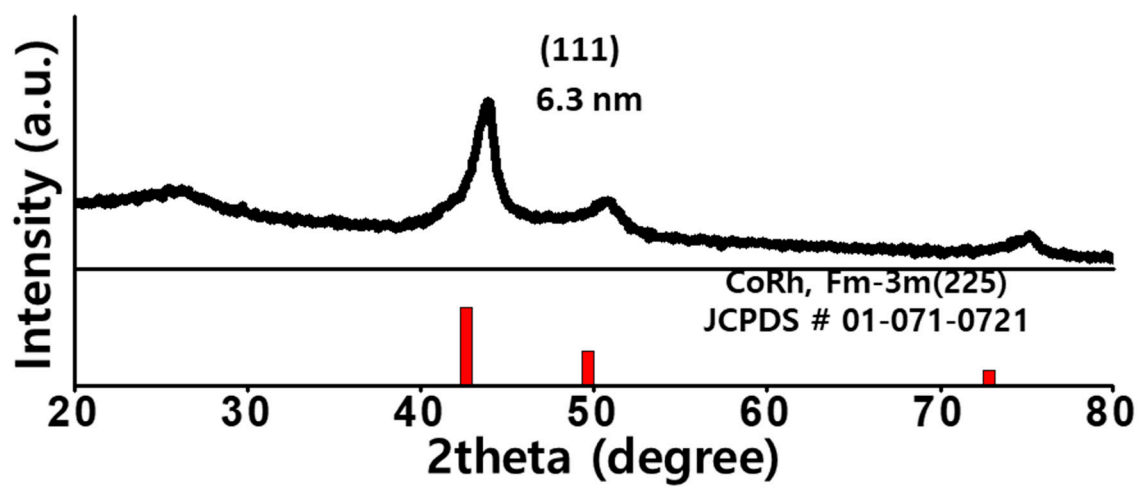

**Figure S2.** The XRD spectrum of RhCo/NC.

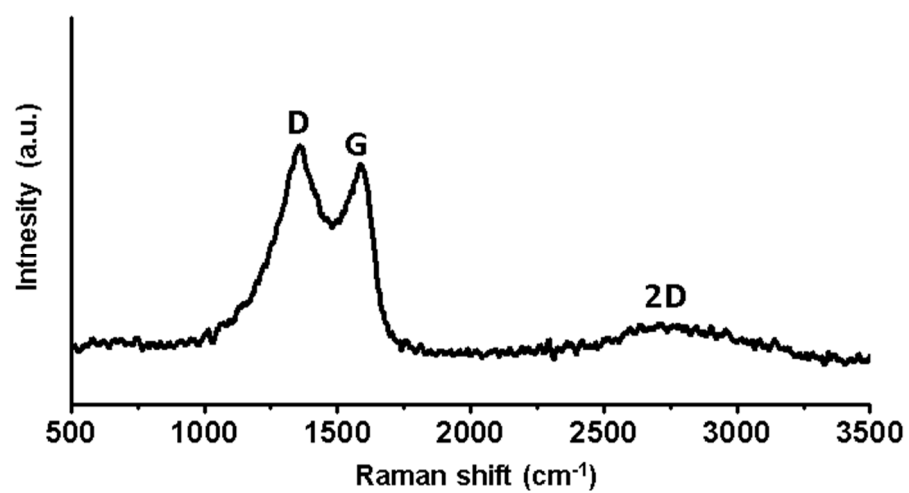

**Figure S3.** The Raman spectrum of RhCo/NC.

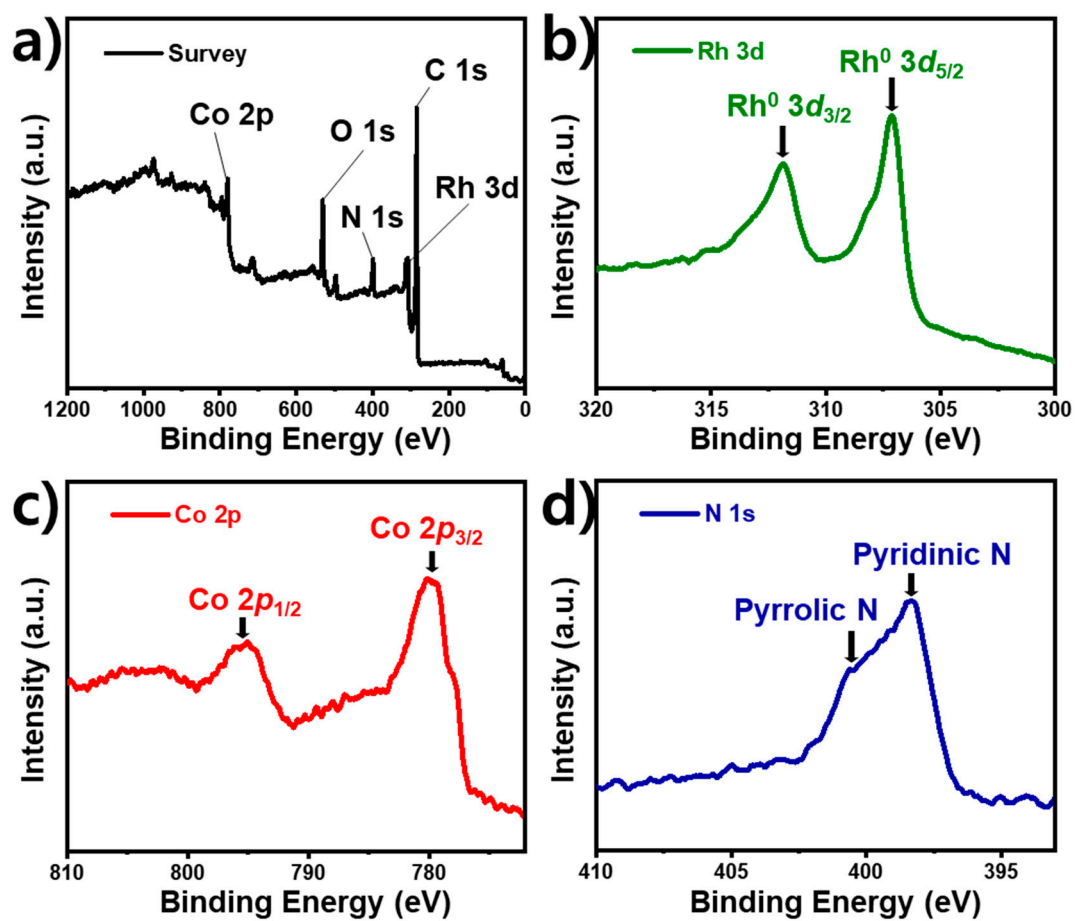

**Figure S4.** (a) XPS survey spectrum of RhCo/NC and XPS spectrum in the energy regions of (b) Rh 3d (c) Co 2p and (d) N 1s.

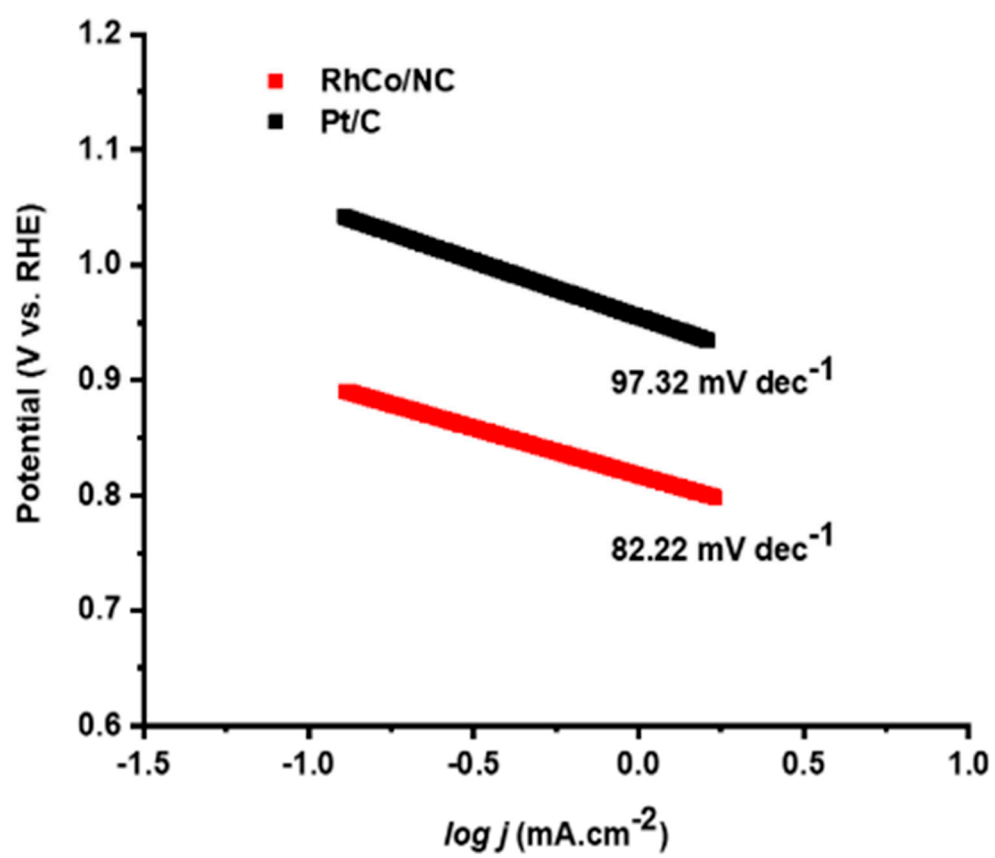

**Figure S5.** Tafel curves of RhCo/NC and Pt/C.

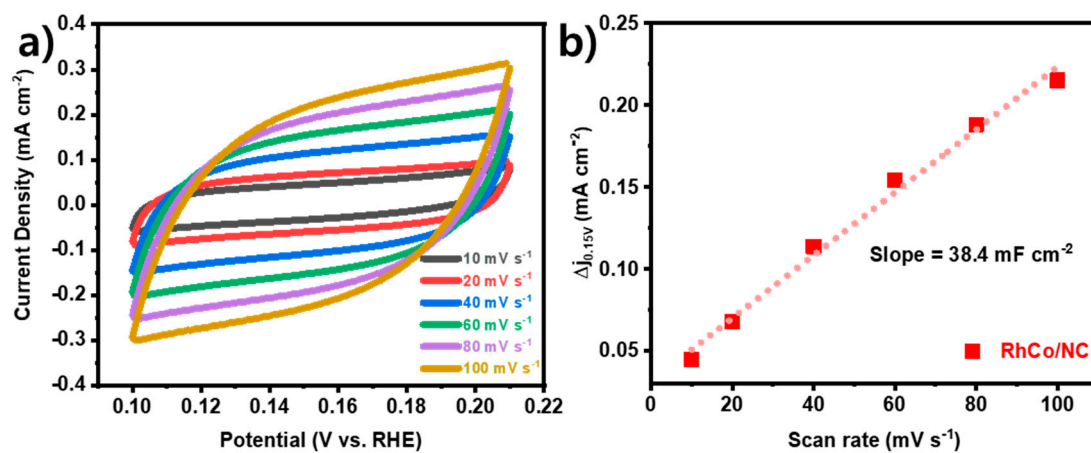

**Figure S6.** (a) The CV curves of RhCo/NC in 0.1 M KOH solution at different scan rates, (b) linearly fitted curve of corresponding scan rate vs capacitive currents.



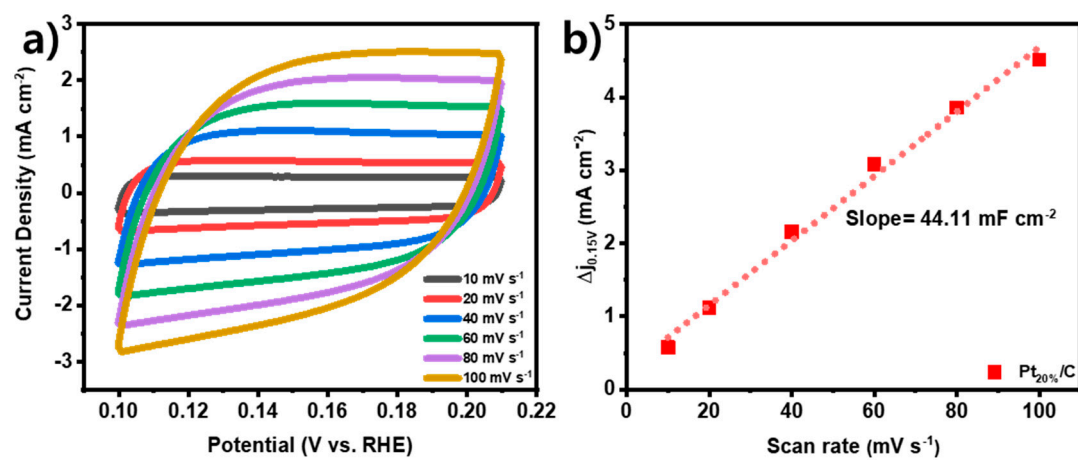

**Figure S7.** (a) The CV curves of Pt/C in 0.1 M KOH solution at different scan rates, (b) linearly fitted curve of corresponding scan rate vs capacitive currents.
